# Supplementary material for: Investigation of effects of varying model inputs on mercury deposition estimates in the Southwest US
Source: Copernicus journal article supplement (doi:10.5194/acp-13-997-2013), 2013-01-23
Supplement: Supplementary file 1 [file acp-13-997-2013-supplement.zip]

**Description of the animation in supplementary materials for Myers et al., Investigation of Effects of Varying Model Inputs on Mercury Deposition Estimates in the Southwest US**

The animation is derived from the simulation discussed in Section 6 of the manuscript. The animation shows the percent contribution to air volume in Layer 1 from air volume that originated in Layers 13 and 14 of the initial or boundary condition files (roughly 5400 m and above). Note that fluxes of the upper layer volume typically occur in areas of high terrain such as the Rocky Mountains or the Sierra Nevada Mountains and the influence spreads to other parts of the modeling domain.
